# Supplementary material for: Impact of the Requirement of Bone Mineral Density Evidence on Utilization of Anti-osteoporosis Medications, Clinical Outcome and Medical Expenditures of Patient With Hip Fracture in Taiwan
Source: PubMed Central journal article supplement (PMC9309953; doi:10.34172/ijhpm.2020.169), 2020-10-03
Supplement: ijhpm-11-470-s001.pdf [file ijhpm-11-470-s001.pdf]

## Supplementary file 1

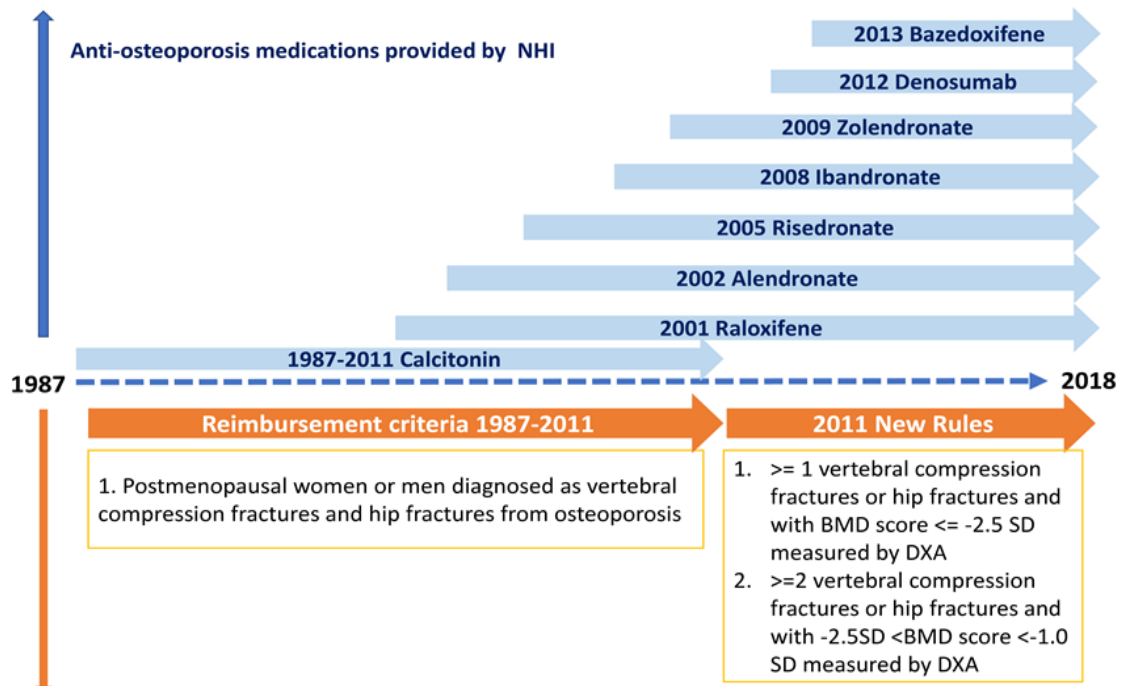

**Figure S1.** Reimbursement of Anti-osteoporosis Medications in Taiwan Since 1987.

**Table S1.** ICD-9-Codes Used in This Study and the Corresponding ICD-10-CM Codes

Applied When Identifying Study Diagnosis Codes After Year 2015

| ICD-9-Codes        | ICD-10-Codes                                                                                                                                                                                                                                                                                                                                                                                                                                                                                                                                                                                  |
|--------------------|-----------------------------------------------------------------------------------------------------------------------------------------------------------------------------------------------------------------------------------------------------------------------------------------------------------------------------------------------------------------------------------------------------------------------------------------------------------------------------------------------------------------------------------------------------------------------------------------------|
| Hip 820            | S72.0, S72.1                                                                                                                                                                                                                                                                                                                                                                                                                                                                                                                                                                                  |
| Spine 805, 806     | S22, S32                                                                                                                                                                                                                                                                                                                                                                                                                                                                                                                                                                                      |
| Humeral 812        | S42                                                                                                                                                                                                                                                                                                                                                                                                                                                                                                                                                                                           |
| Wrist 813          | S52                                                                                                                                                                                                                                                                                                                                                                                                                                                                                                                                                                                           |
| ICD-9 OP-Codes     | ICD-10-OP-Codes                                                                                                                                                                                                                                                                                                                                                                                                                                                                                                                                                                               |
| Hip Fracture       |                                                                                                                                                                                                                                                                                                                                                                                                                                                                                                                                                                                               |
| 81.52              | 0SRA009,0SRA00A,0SRA00Z,0SRA019,0SRA01A,0SRA01Z,0SRA039,0SRA03A,0SRA03Z,0SRA07Z,0SRA0J9,0SRA0JA,0SRA0JZ,0SRA0KZ,0SRE009,0SRE00A,0SRE00Z,0SRE019,0SRE01A,0SRE01Z,0SRE039,0SRE03A,0SRE03Z,0SRE07Z,0SRE0J9,0SRE0JA,0SRE0JZ,0SRE0KZ,0SRR019,0SRR01A,0SRR01Z,0SRR039,0SRR03A,0SRR03Z,0SRR07Z,0SRR0J9,0SRR0JA,0SRR0JZ,0SRR0KZ,0SRS019,0SRS01A,0SRS01Z,0SRS039,0SRS03A,0SRS03Z,0SRS07Z,0SRS0J9,0SRS0JA,0SRS0JZ,0SRS0KZ                                                                                                                                                                               |
| 79.35              | 0QS604Z,0QS606Z,0QS704Z,0QS706Z                                                                                                                                                                                                                                                                                                                                                                                                                                                                                                                                                               |
| 79.15              | 0QS634Z,0QS644Z,0QS734Z,0QS744Z,0QS834Z,0QS844Z,0QS934Z,0QS944Z,0QSB34Z,0QSB44Z,0QSC34Z,0QSC44Z                                                                                                                                                                                                                                                                                                                                                                                                                                                                                               |
| Vertebral Fracture |                                                                                                                                                                                                                                                                                                                                                                                                                                                                                                                                                                                               |
| 03.53              | 0PS304Z, 0PS30ZZ, 0PS334Z, 0PS33ZZ, 0PS344Z, 0PS34ZZ, 0PS3XZZ, 0PS404Z, 0PS40ZZ, 0PS434Z, 0PS43ZZ, 0PS444Z, 0PS44ZZ, 0PS4XZZ, 0QS004Z, 0QS00ZZ, 0QS034Z,0QS03ZZ, 0QS044Z, 0QS04ZZ, 0QS0XZZ, 0QS104Z, 0QS10ZZ, 0QS134Z, 0QS13ZZ, 0QS144Z, 0QS14ZZ, 0QS1XZZ, 0PU307Z, 0PU30JZ, 0PU30KZ, 0PU337Z, 0PU33JZ, 0PU33KZ, 0PU347Z, 0PU34JZ, 0PU34KZ, 0PU407Z, 0PU40JZ, 0PU40KZ, 0PU437Z, 0PU43JZ, 0PU43KZ, 0PU447Z, 0PU44JZ, 0PU44KZ, 0QU007Z, 0QU00JZ, 0QU00KZ, 0QU037Z, 0QU03JZ, 0QU03KZ, 0QU047Z, 0QU04JZ, 0QU04KZ, 0QU107Z, 0QU10JZ, 0QU10KZ, 0QU137Z, 0QU13JZ, 0QU13KZ, 0QU147Z, 0QU14JZ, 0QU14KZ |
| 78.49              | 0PQ30ZZ, 0PQ33ZZ, 0PQ34ZZ, 0PQ3XZZ, 0PQ40ZZ, 0PQ43ZZ, 0PQ44ZZ, 0PQ4XZZ, 0QQ00ZZ, 0QQ03ZZ, 0QQ04ZZ, 0QQ0XZZ, 0QQ10ZZ, 0QQ13ZZ, 0QQ14ZZ, 0QQ1XZZ, 0PU307Z, 0PU30JZ,0PU30KZ, 0PU337Z, 0PU33JZ, 0PU33KZ, 0PU347Z, 0PU34JZ, 0PU34KZ, 0PU407Z, 0PU40JZ, 0PU40KZ, 0PU437Z, 0PU43JZ, 0PU43KZ, 0PU447Z, 0PU44JZ, 0PU44KZ, 0QU007Z, 0QU00JZ, 0QU00KZ, 0QU037Z, 0QU03JZ, 0QU03KZ, 0QU047Z, 0QU04JZ, 0QU04KZ, 0QU107Z, 0QU10JZ, 0QU10KZ, 0QU137Z, 0QU13JZ,0QU13KZ, 0QU147Z, 0QU14JZ,                                                                                                                      |

|         |                                                                                                                                                                                                                                                                                                                                                                                                                                                                                                                                                                                                         |
|---------|---------------------------------------------------------------------------------------------------------------------------------------------------------------------------------------------------------------------------------------------------------------------------------------------------------------------------------------------------------------------------------------------------------------------------------------------------------------------------------------------------------------------------------------------------------------------------------------------------------|
|         | 0QU14KZ, 0PS304Z, 0PS30ZZ, 0PS334Z, 0PS33ZZ, 0PS344Z, 0PS34ZZ, 0PS3XZZ, 0PS404Z, 0PS40ZZ, 0PS434Z, 0PS43ZZ, 0PS444Z, 0PS44ZZ, 0PS4XZZ, 0QS004Z, 0QS00ZZ, 0QS034Z, 0QS03ZZ, 0QS044Z, 0QS04ZZ, 0QS0XZZ, 0QS104Z, 0QS10ZZ, 0QS134Z, 0QS13ZZ, 0QS144Z, 0QS14ZZ, 0QS1XZZ, 0PU307Z, 0PU30JZ, 0PU30KZ, 0PU337Z, 0PU33JZ, 0PU33KZ, 0PU347Z, 0PU34JZ, 0PU34KZ, 0PU407Z, 0PU40JZ, 0PU40KZ, 0PU437Z, 0PU43JZ, 0PU43KZ, 0PU447Z, 0PU44JZ, 0PU44KZ, 0QU007Z, 0QU00JZ, 0QU00KZ, 0QU037Z, 0QU03JZ, 0QU03KZ, 0QU047Z, 0QU04JZ, 0QU04KZ, 0QU107Z, 0QU10JZ, 0QU10KZ, 0QU137Z, 0QU13JZ, 0QU13KZ, 0QU147Z, 0QU14JZ, 0QU14KZ |
| Humeral |                                                                                                                                                                                                                                                                                                                                                                                                                                                                                                                                                                                                         |
| 79.01   | 0PSC3ZZ, 0PSC4ZZ, 0PSCXZZ, 0PSD3ZZ, 0PSD4ZZ, 0PSDXZZ                                                                                                                                                                                                                                                                                                                                                                                                                                                                                                                                                    |
| 79.11   | 0PSC34Z, 0PSC36Z, 0PSC44Z, 0PSC46Z, 0PSD34Z, 0PSD36Z, 0PSD44Z, 0PSD46Z                                                                                                                                                                                                                                                                                                                                                                                                                                                                                                                                  |
| 79.21   | 0PSC0ZZ, 0PSD0ZZ                                                                                                                                                                                                                                                                                                                                                                                                                                                                                                                                                                                        |
| 79.31   | 0PSC04Z, 0PSC06Z, 0PSD04Z, 0PSD06Z                                                                                                                                                                                                                                                                                                                                                                                                                                                                                                                                                                      |
| Wrist   |                                                                                                                                                                                                                                                                                                                                                                                                                                                                                                                                                                                                         |
| 78.53   | 0PHH04Z, 0PHH34Z, 0PHH44Z, 0PHJ04Z, 0PHJ34Z, 0PHJ44Z, 0PHK04Z, 0PHK34Z, 0PHK44Z, 0PHL04Z, 0PHL34Z, 0PHL44Z                                                                                                                                                                                                                                                                                                                                                                                                                                                                                              |
| 79.02   | 0PSH3ZZ, 0PSH4ZZ, 0PSHXZZ, 0PSJ3ZZ, 0PSJ4ZZ, 0PSJXZZ, 0PSK3ZZ, 0PSK4ZZ, 0PSKXZZ, 0PSL3ZZ, 0PSL4ZZ, 0PSLXZZ                                                                                                                                                                                                                                                                                                                                                                                                                                                                                              |
| 79.12   | 0PSH34Z, 0PSH36Z, 0PSH44Z, 0PSH46Z, 0PSJ34Z, 0PSJ36Z, 0PSJ44Z, 0PSJ46Z, 0PSK34Z, 0PSK36Z, 0PSK44Z, 0PSK46Z, 0PSL34Z, 0PSL36Z, 0PSL44Z, 0PSL46Z                                                                                                                                                                                                                                                                                                                                                                                                                                                          |
| 79.22   | 0PSH0ZZ, 0PSJ0ZZ, 0PSK0ZZ, 0PSL0ZZ                                                                                                                                                                                                                                                                                                                                                                                                                                                                                                                                                                      |
| 79.32   | 0PSH04Z, 0PSH06Z, 0PSJ04Z, 0PSJ06Z, 0PSK04Z, 0PSK06Z, 0PSL04Z, 0PSL06Z                                                                                                                                                                                                                                                                                                                                                                                                                                                                                                                                  |

**Table S2.** Studies Evaluating AOMs Effectiveness and Defining Subsequent Osteoporotic Fracture as Outcomes by Using Claims Data

| Author, year, country              | Study population                      | Clinic outcomes                                             | Outcome Definition                                                                                                                                                                                      | Criteria adopted in the study |            |      |    |      |
|------------------------------------|---------------------------------------|-------------------------------------------------------------|---------------------------------------------------------------------------------------------------------------------------------------------------------------------------------------------------------|-------------------------------|------------|------|----|------|
|                                    |                                       |                                                             |                                                                                                                                                                                                         | ICD                           | Visit type | Time | OP | Exam |
| Ryg et al.<br>2009 Denmark,        | Incidence of Hip fracture             | Secondary hip fracture                                      | 1. The fractures were validated by matching fracture date with date of surgical procedure codes<br>2. Patients referred from out-patient clinics were excluded                                          | ○                             | ○          | ○    | ○  |      |
| Overman et al<br>2015, USA,        | AOMs initiator                        | Osteoporotic fractures                                      | 1. Hip, pelvis, humerus, wrist - used ICD-9 code with ICD-9-OP codes;<br>2. Spine fractures - used ICD-9 codes                                                                                          | ○                             |            |      | ○  |      |
| Hawley et al<br>2016, UK,          | Hip Fracture                          | Subsequent major re-fracture/<br>Hip re-fracture            | 1. Sustaining a subsequent major fracture within 3 years of the primary event.<br>2. Hip fractures were only included if sustained between 6 and 36 months so as to avoid counting of re-coding events. | ○                             |            | ○    |    |      |
| Author<br>(year, country, journal) | Study population                      | Clinic outcomes                                             | Outcome Definition                                                                                                                                                                                      | Criteria adopted in the study |            |      |    |      |
|                                    |                                       |                                                             |                                                                                                                                                                                                         | ICD                           | Visit type | Time | OP | Exam |
| Lin et al, 2013,Taiwan             | HIP/Spine fractures + initiating AOMs | Non vertebral fractures (Hip, humerus, or radius fractures) | 1. All outcomes were derived from inpatient claims.                                                                                                                                                     | ○                             | ○          |      |    |      |
| Lee et al, 2016, Taiwan            | Hip Fracture                          | Secondary hip                                               | 1. Fractures occurring more than 2 weeks after the first fracture<br>2. Validated as an incident hip fracture: (ICD-9-CM:                                                                               | ○                             | ○          | ○    | ○  |      |

|                           |                |                                                        |                                                                                                                                                                                                                        |   |   |  |   |  |
|---------------------------|----------------|--------------------------------------------------------|------------------------------------------------------------------------------------------------------------------------------------------------------------------------------------------------------------------------|---|---|--|---|--|
|                           |                |                                                        | 820 with ICD-9-CM Procedure Code 81.52 or internal fixation: 79.15, 79.35).                                                                                                                                            |   |   |  |   |  |
| Soong et al, 2013, Taiwan | AOMs initiator | Risk of re-fracture/<br>Probable osteoporotic fracture | 1. Hospitalization and outpatient department surgical procedures for a new osteoporotic fracture during follow-up.<br>2. Hospitalizations were selected based on discharge diagnosis of probable osteoporotic fracture | ○ | ○ |  | ○ |  |

Abbreviations: AOMs, Anti-osteoporosis medication; OPD, outpatient department; ICD, ICD-9-CM Codes; Visit type, admission or OPD; Time, consider time interval or temporal relationship; OP, operation; Exam, fracture related radiological imaging examination.

**Table S3.** Specific Codes for Identifying Osteoporotic Fractures

|                | Hip                 | Spine        | Humeral                                       | Wrist                                                |
|----------------|---------------------|--------------|-----------------------------------------------|------------------------------------------------------|
| ICD-9-CM code  | 820                 | 805 or 806   | 812                                           | 813                                                  |
| ICD-9-OP codes | 81.52; 79.35; 79.15 | 08.53; 78.49 | 87.52; 79.01; 79.11;<br>79.21;<br>79.31;79.61 | 78.53; 79.02;<br>79.12;<br>79.22;<br>79.32;<br>79.62 |

**Table S4.** Coefficient of determination ( $R^2$ ) and results of Durbin-Watson test for each segmented regression model

|                 | BMD exam        |               | AOMs prescriptions |               | Subsequent fracture |               | Fracture related cost |               |
|-----------------|-----------------|---------------|--------------------|---------------|---------------------|---------------|-----------------------|---------------|
|                 | Model: R square | Durbin-Watson | Model: R square    | Durbin-Watson | Model: R square     | Durbin-Watson | Model: R square       | Durbin-Watson |
| Female, age (y) |                 |               |                    |               |                     |               |                       |               |
| 50-64           | 0.87            | 1.90          | 0.62               | 1.96          | 0.27                | 2.06          | 0.42                  | 2.07          |
| 65-79           | 0.98            | 1.97          | 0.69               | 2.07          | 0.18                | 1.89          | 0.77                  | 2.00          |
| +80             | 0.97            | 1.96          | 0.60               | 1.95          | 0.11                | 1.96          | 0.91                  | 2.01          |
| Male, age (y)   |                 |               |                    |               |                     |               |                       |               |
| 50-64           | 0.82            | 1.98          | 0.59               | 2.06          | 0.06                | 1.93          | 0.16                  | 1.99          |
| 65-79           | 0.94            | 1.98          | 0.78               | 1.85          | 0.05                | 1.98          | 0.21                  | 2.05          |
| +80             | 0.96            | 1.93          | 0.76               | 1.96          | 0.20                | 1.85          | 0.91                  | 1.99          |

**Table S5.** Osteoporotic fracture related visits within 3 years post index hip fracture

|        | Female-Osteoporotic fracture related visits (Frequency) |      |    |           |      |     |         |      |     |
|--------|---------------------------------------------------------|------|----|-----------|------|-----|---------|------|-----|
|        | Age 50-64                                               |      |    | Age 65-79 |      |     | Age 80+ |      |     |
|        | OPD                                                     | Hosp | ER | OPD       | Hosp | ER  | OPD     | Hosp | ER  |
| 2006Q1 | 939                                                     | 194  | 44 | 3554      | 822  | 226 | 3256    | 871  | 301 |
| 2006Q2 | 1069                                                    | 212  | 53 | 3502      | 789  | 259 | 2651    | 764  | 268 |
| 2006Q3 | 938                                                     | 161  | 51 | 3221      | 761  | 224 | 3064    | 742  | 223 |

|        | <b>Female-Osteoporotic fracture related visits (Frequency)</b> |             |           |                  |             |           |                |             |           |
|--------|----------------------------------------------------------------|-------------|-----------|------------------|-------------|-----------|----------------|-------------|-----------|
|        | <b>Age 50-64</b>                                               |             |           | <b>Age 65-79</b> |             |           | <b>Age 80+</b> |             |           |
|        | <b>OPD</b>                                                     | <b>Hosp</b> | <b>ER</b> | <b>OPD</b>       | <b>Hosp</b> | <b>ER</b> | <b>OPD</b>     | <b>Hosp</b> | <b>ER</b> |
| 2006Q4 | 932                                                            | 198         | 63        | 4027             | 864         | 294       | 3561           | 861         | 264       |
| 2007Q1 | 962                                                            | 181         | 56        | 4226             | 917         | 290       | 3283           | 920         | 291       |
| 2007Q2 | 1111                                                           | 195         | 59        | 3782             | 708         | 260       | 2403           | 705         | 231       |
| 2007Q3 | 835                                                            | 149         | 42        | 3486             | 786         | 239       | 2961           | 757         | 231       |
| 2007Q4 | 1041                                                           | 189         | 62        | 4462             | 907         | 292       | 3280           | 915         | 272       |
| 2008Q1 | 1493                                                           | 227         | 63        | 4058             | 956         | 304       | 3800           | 978         | 312       |
| 2008Q2 | 1051                                                           | 182         | 56        | 3769             | 759         | 262       | 3376           | 795         | 257       |
| 2008Q3 | 1212                                                           | 178         | 66        | 4394             | 824         | 277       | 3131           | 784         | 266       |
| 2008Q4 | 1370                                                           | 225         | 74        | 4244             | 904         | 310       | 3593           | 922         | 309       |
| 2009Q1 | 1371                                                           | 206         | 63        | 4334             | 911         | 376       | 4311           | 1031        | 342       |
| 2009Q2 | 1144                                                           | 165         | 48        | 3562             | 738         | 269       | 3297           | 815         | 314       |
| 2009Q3 | 1509                                                           | 188         | 64        | 3748             | 773         | 246       | 4090           | 858         | 311       |
| 2009Q4 | 1535                                                           | 194         | 67        | 3933             | 858         | 325       | 4324           | 955         | 360       |
| 2010Q1 | 1240                                                           | 209         | 80        | 4136             | 812         | 378       | 3977           | 955         | 440       |
| 2010Q2 | 1453                                                           | 190         | 89        | 3200             | 699         | 301       | 3757           | 858         | 389       |
| 2010Q3 | 1344                                                           | 204         | 85        | 3929             | 778         | 341       | 3614           | 801         | 334       |
| 2010Q4 | 1661                                                           | 218         | 80        | 3932             | 784         | 319       | 3943           | 956         | 398       |
| 2011Q1 | 1554                                                           | 220         | 76        | 4732             | 901         | 334       | 5643           | 1140        | 437       |
| 2011Q2 | 1512                                                           | 204         | 79        | 4344             | 759         | 261       | 3888           | 788         | 297       |
| 2011Q3 | 1384                                                           | 207         | 88        | 4015             | 752         | 240       | 3766           | 809         | 302       |
| 2011Q4 | 1633                                                           | 236         | 62        | 4959             | 827         | 284       | 4779           | 998         | 396       |
| 2012Q1 | 1816                                                           | 255         | 82        | 5345             | 907         | 333       | 5783           | 1132        | 410       |
| 2012Q2 | 1409                                                           | 191         | 62        | 3941             | 669         | 232       | 4572           | 823         | 263       |
| 2012Q3 | 1572                                                           | 208         | 63        | 4460             | 738         | 240       | 4218           | 870         | 282       |
| 2012Q4 | 1166                                                           | 200         | 60        | 4437             | 825         | 271       | 4639           | 1029        | 351       |
| 2013Q1 | 1453                                                           | 211         | 72        | 4895             | 839         | 270       | 6047           | 1141        | 414       |
| 2013Q2 | 1503                                                           | 229         | 71        | 3946             | 666         | 195       | 4561           | 847         | 284       |
| 2013Q3 | 1314                                                           | 215         | 48        | 4821             | 744         | 260       | 5147           | 918         | 329       |
| 2013Q4 | 1683                                                           | 255         | 82        | 5407             | 823         | 285       | 6062           | 1107        | 345       |
| 2014Q1 | 1809                                                           | 273         | 86        | 5607             | 878         | 324       | 6649           | 1200        | 411       |

|        | Female-Osteoporotic fracture related visits (Frequency) |      |     |           |      |     |         |      |     |
|--------|---------------------------------------------------------|------|-----|-----------|------|-----|---------|------|-----|
|        | Age 50-64                                               |      |     | Age 65-79 |      |     | Age 80+ |      |     |
|        | OPD                                                     | Hosp | ER  | OPD       | Hosp | ER  | OPD     | Hosp | ER  |
| 2014Q2 | 1756                                                    | 246  | 63  | 4021      | 703  | 227 | 4254    | 896  | 323 |
| 2014Q3 | 1277                                                    | 193  | 79  | 4237      | 769  | 270 | 4749    | 927  | 333 |
| 2014Q4 | 1957                                                    | 283  | 100 | 4683      | 881  | 321 | 5734    | 1150 | 425 |

**Table S6.** Osteoporotic Fracture Related Visits Within 3 Years Post Index Hip Fracture

|        | Male-Osteoporotic fracture related visits (Frequency) |      |     |           |      |     |         |      |     |
|--------|-------------------------------------------------------|------|-----|-----------|------|-----|---------|------|-----|
|        | Age 50-64                                             |      |     | Age 65-79 |      |     | Age 80+ |      |     |
|        | OPD                                                   | Hosp | ER  | OPD       | Hosp | ER  | OPD     | Hosp | ER  |
| 2006Q1 | 726                                                   | 187  | 46  | 2753      | 680  | 196 | 2122    | 523  | 144 |
| 2006Q2 | 994                                                   | 188  | 42  | 2462      | 543  | 171 | 1633    | 431  | 137 |
| 2006Q3 | 887                                                   | 191  | 54  | 2354      | 540  | 177 | 1389    | 416  | 110 |
| 2006Q4 | 830                                                   | 198  | 67  | 2496      | 629  | 182 | 1974    | 504  | 176 |
| 2007Q1 | 779                                                   | 172  | 44  | 2215      | 567  | 176 | 2354    | 581  | 204 |
| 2007Q2 | 811                                                   | 181  | 55  | 2103      | 503  | 146 | 2274    | 452  | 161 |
| 2007Q3 | 1078                                                  | 212  | 42  | 1789      | 515  | 155 | 1669    | 462  | 144 |
| 2007Q4 | 1038                                                  | 210  | 61  | 2403      | 588  | 164 | 2464    | 563  | 168 |
| 2008Q1 | 764                                                   | 185  | 56  | 2670      | 648  | 220 | 2230    | 644  | 182 |
| 2008Q2 | 898                                                   | 196  | 47  | 2187      | 531  | 159 | 1557    | 480  | 170 |
| 2008Q3 | 925                                                   | 198  | 55  | 1816      | 542  | 164 | 1511    | 469  | 146 |
| 2008Q4 | 1190                                                  | 220  | 57  | 2852      | 604  | 214 | 2394    | 653  | 230 |
| 2009Q1 | 1153                                                  | 233  | 70  | 2830      | 619  | 196 | 2685    | 677  | 251 |
| 2009Q2 | 825                                                   | 208  | 54  | 2026      | 498  | 176 | 2227    | 522  | 175 |
| 2009Q3 | 1013                                                  | 197  | 49  | 2322      | 507  | 159 | 2368    | 463  | 161 |
| 2009Q4 | 1159                                                  | 236  | 61  | 2395      | 531  | 187 | 3013    | 629  | 210 |
| 2010Q1 | 1578                                                  | 260  | 120 | 2929      | 597  | 248 | 3033    | 650  | 299 |
| 2010Q2 | 1404                                                  | 251  | 104 | 2303      | 464  | 233 | 2142    | 562  | 230 |
| 2010Q3 | 1231                                                  | 209  | 67  | 2323      | 481  | 198 | 2401    | 520  | 210 |
| 2010Q4 | 1041                                                  | 239  | 74  | 2328      | 490  | 202 | 2798    | 655  | 239 |
| 2011Q1 | 1654                                                  | 242  | 97  | 2904      | 562  | 210 | 3580    | 766  | 295 |
| 2011Q2 | 1396                                                  | 247  | 85  | 2764      | 524  | 178 | 2200    | 539  | 205 |
| 2011Q3 | 1218                                                  | 249  | 79  | 2052      | 456  | 144 | 2552    | 517  | 179 |
| 2011Q4 | 1375                                                  | 237  | 82  | 2231      | 513  | 159 | 3019    | 620  | 213 |
| 2012Q1 | 1557                                                  | 227  | 68  | 1880      | 441  | 172 | 2474    | 547  | 183 |
| 2012Q2 | 1329                                                  | 256  | 75  | 2111      | 468  | 154 | 2351    | 520  | 181 |



|               | <b>Male-Osteoporotic fracture related visits (Frequency)</b> |             |           |                  |             |           |                |             |           |
|---------------|--------------------------------------------------------------|-------------|-----------|------------------|-------------|-----------|----------------|-------------|-----------|
|               | <b>Age 50-64</b>                                             |             |           | <b>Age 65-79</b> |             |           | <b>Age 80+</b> |             |           |
|               | <b>OPD</b>                                                   | <b>Hosp</b> | <b>ER</b> | <b>OPD</b>       | <b>Hosp</b> | <b>ER</b> | <b>OPD</b>     | <b>Hosp</b> | <b>ER</b> |
| <i>2012Q3</i> | 1173                                                         | 240         | 75        | 2586             | 466         | 158       | 3162           | 703         | 222       |
| <i>2012Q4</i> | 1491                                                         | 267         | 92        | 3044             | 490         | 156       | 3306           | 681         | 263       |
| <i>2013Q1</i> | 1379                                                         | 252         | 87        | 2461             | 471         | 133       | 2585           | 552         | 194       |
| <i>2013Q2</i> | 1367                                                         | 241         | 77        | 2164             | 447         | 153       | 2847           | 564         | 199       |
| <i>2013Q3</i> | 1347                                                         | 264         | 90        | 2330             | 472         | 145       | 3701           | 774         | 263       |
| <i>2013Q4</i> | 1388                                                         | 304         | 75        | 2245             | 505         | 157       | 3685           | 746         | 241       |
| <i>2014Q1</i> | 1159                                                         | 242         | 61        | 1993             | 445         | 158       | 2844           | 564         | 174       |
| <i>2014Q2</i> | 1295                                                         | 253         | 70        | 2238             | 441         | 136       | 2962           | 565         | 187       |
| <i>2014Q3</i> | 1322                                                         | 284         | 89        | 2265             | 471         | 167       | 3667           | 702         | 251       |
| <i>2014Q4</i> | 1557                                                         | 227         | 68        | 1880             | 441         | 172       | 2474           | 547         | 183       |
